# Supplementary material
Source: MDPI journal article supplement (https://www.mdpi.com/2076-3417/10/21/7721)
Supplement: s1 [file s1]

# Supplementary Materials: Monitoring Living Modified Canola Using an Efficient Multiplex PCR Assay in Natural Environments in South Korea

Il Ryong Kim, Hye Song Lim, Wonkyun Choi, Da In Kang, Sang Yeol Lee and Jung Ro Lee

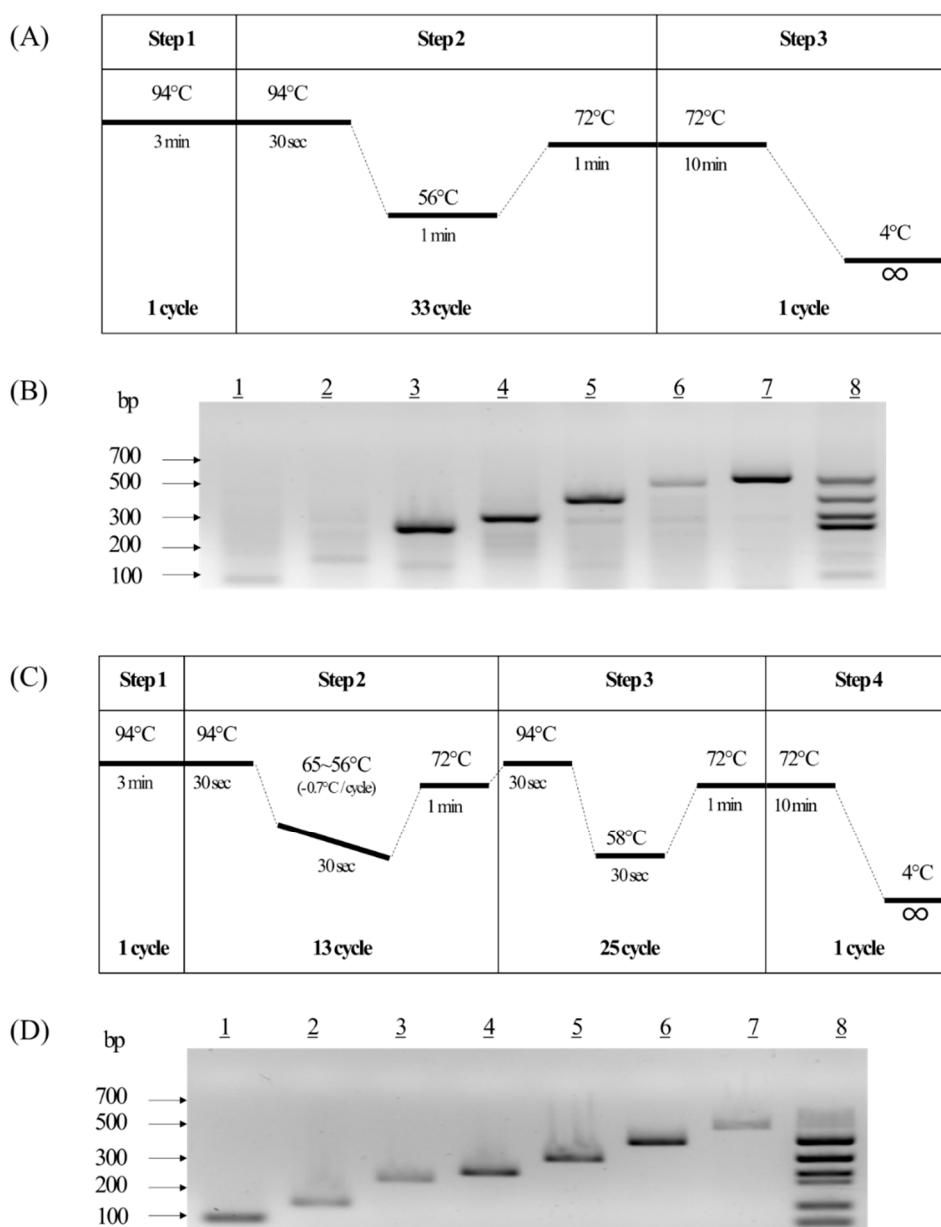

**Supplementary Figure S1.** Analysis for establishment of the novel multiplex PCR under various conditions for seven LM canola events. (A) Schematic diagram of the conventional PCR conditions. (B) Agarose gel image of products obtained using the multiplex PCR method under conventional PCR conditions. (C) Schematic diagram of the touchdown PCR condition using the annealing temperature of 58 °C in step 3. (D) Agarose gel image of products obtained using the multiplex PCR method for the LM canola under touchdown PCR conditions. Each line indicates Topas 19/2 (line 1), Rf3 (line 2), Dp-073496-4 (line 3), Ms8 (line 4), GT73 (line 5), Mon88032 (line 6), T45 (line 7), and the multiplex PCR product (line 8).
